# Supplementary material for: Pattern formation of metal–oxide hybrid nanostructuresviathe self-assembly of di-block copolymer blends
Source: Royal Society of Chemistry journal article supplement (doi:10.1039/c9nr04038b), 2019-01-01
Supplement: c9nr04038b1.pdf [file c9nr04038b1.pdf]

## Supporting Information

### Pattern Formation of Metal-Oxide Hybrid Nanostructures via the Self-Assembly of di-Block Copolymer Blends

*Dae Soo Jung<sup>a†</sup>, Jiwon Bang<sup>a†</sup>, Tae Wan Park<sup>a</sup>, Seung Hyup Lee<sup>a</sup>, Yun Kyung Jung<sup>b</sup>, Myunghwan Byun<sup>c</sup>, Young-Rae Cho<sup>d</sup>, Kwang Ho Kim<sup>\*d,e</sup>, Gi Hun Seong<sup>\*f</sup>, and Woon Ik Park<sup>\*a</sup>*

<sup>a</sup>Electronic Convergence Materials Division, Korea Institute of Ceramic Engineering & Technology (KICET) 101 Soho-ro, Jinju 52851, Republic of Korea

<sup>b</sup>Department of Biomedical Engineering, Inje University, 197 Inje-ro, Nam-Gu, Kimhae, Republic of Korea

<sup>c</sup>Department of Advanced Materials Engineering, Keimyung University, 1095 Dalgubeol-daero, Daegu 42601, Republic of Korea \

<sup>d</sup>Department of Materials Science and Engineering, Pusan National University (PNU), Pusan 46241, Republic of Korea

<sup>e</sup>Global Frontier R&D Center for Hybrid Interface Materials, Busan 46241, Republic of Korea

<sup>f</sup>Department of Bionano Engineering, Hanyang University, Ansan 15588, Republic of Korea

<sup>†</sup>These authors contributed equally.

KEYWORDS: block copolymer, self-assembly, blend, metal-oxide, hybrid nanostructure

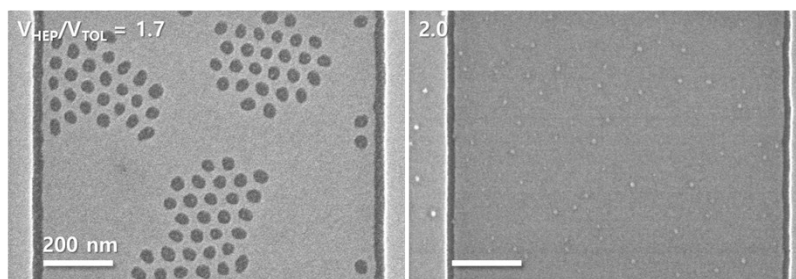

**Figure S1. Self-assembled cylinder-forming DS45 BCP after annealing with a binary solvent of toluene and heptane.** A Mixed BCP morphology of HPL and lamella was observed when  $V_{\text{HEP}}/V_{\text{TOL}} = 1.7$  (left), while a pure lamellar structure was formed when  $V_{\text{HEP}}/V_{\text{TOL}} = 2.0$  (right).

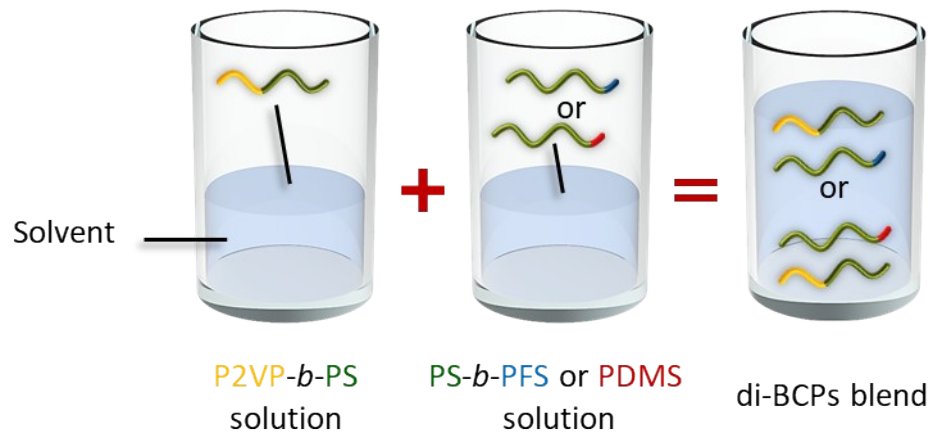

**Figure S2. Blending of di-BCPs dissolved in toluene.** Majority blocks of all of the di-BCPs are identical to the PS block; thus di-BCPs can be easily dissolved in toluene, which is a good solvent for PS. All of the di-BCP solutions were blended at a one-to-one ratio.
